# **Investigating dietary quality among individuals aged 15 years and over by diabetes status in South Africa**

## **Dietary quality by diabetes status in South Africa**

Matthew Burgess<sup>1</sup> (Corresponding author), matt.burgess1@outlook.com

Professor Nuala McGrath<sup>1,2,3</sup>

1. CHERISH programme, School of Primary Care, Population Sciences and Medical Education, Faculty of Medicine, University of Southampton, Southampton, UK.
2. Department of Social Statistics & Demography, Faculty of Social Sciences, University of Southampton, Southampton, UK).
3. Africa Health Research Institute, Durban, KwaZulu-Natal, South Africa.

30 **Abstract:**

31

32 Analysis of the 2016 South African Demographic and Health Survey (SADHS) estimated that 11.7% of  
33 individuals aged 15+ years had poor glycaemic control, despite only 4.7% reporting a previous  
34 diabetes diagnosis, and a further 64.5% had prediabetes. Diet-related lifestyle change has an  
35 important role in diabetes prevention and management, however entrenched racial and  
36 socioeconomic inequalities and increasing urbanisation may present barriers to a healthy diet.

37 Using data from the 2016 SADHS we investigated whether dietary choices differ by diabetes status  
38 defined by previous diagnosis and survey HbA1c, and whether the diet of people living with diabetes  
39 (PLWD) differs by age, gender, ethnicity and wealth quintile. Reporting of fruit, vegetable, sugar-  
40 sweetened beverage, fruit juice and fast-food consumption was used to create an index of healthy  
41 diet. Ordered logistic regression modelling considering the proportional odds assumption was used  
42 to investigate the effect of diabetes status and sociodemographic status on healthy diet among the  
43 general population and PLWD.

44 Concurrent low consumption of fruit, vegetables and fruit juice was the most common dietary  
45 pattern among both the general population and people living with diabetes, with high consumption  
46 of fast-food and sugar-sweetened beverage less common. Among the general population, previous  
47 diabetes diagnosis, age  $\geq 55$  years, non-black African ethnicity and being in the wealthiest quintile  
48 were significantly associated with increased odds of a healthier diet. Among PLWD, there was no  
49 association between previous diabetes diagnosis and healthy diet, high wealth remained  
50 significantly associated with a healthier diet, whilst female gender and having health insurance also  
51 became significantly associated with a healthier diet.

52 Future public health interventions should focus on making fruit and vegetables more accessible to  
53 younger, black and socioeconomically poor populations, irrespective of diabetes status.

54

55 **Keywords:**

56 Type 2 Diabetes, Diet, South Africa, Fruit and Vegetables, Sub-Saharan Africa, Ordered  
57 Logistic Regression.

58

59 **List of Abbreviations:**

60 PLWD – person/people living with diabetes.

61 LMIC – low or middle-income country

62 NCD – non-communicable disease

63 T2DM – Type 2 diabetes mellitus

64 SADHS – South African Demographic and Health Survey

65 HbA1c – Glycosylated haemoglobin

- 66 EA – Enumeration area
- 67 PSU – Primary sampling unit
- 68 SSB – Sugar-sweetened beverage
- 69 UPF – Ultra-processed food
- 70 BMI – Body mass index
- 71 SADOH – South African Department of Health
- 72 SES – Socioeconomic status

73

## 74 **Introduction**

75

76 An epidemiological transition is currently ongoing in many low- and middle-income countries  
77 (LMICs), with infectious diseases such as HIV, malaria and tuberculosis decreasing as leading causes  
78 of mortality and being replaced by non-communicable diseases (NCDs), such as type two diabetes  
79 mellitus (T2DM)<sup>1</sup>. T2DM prevalence in South Africa has increased during the previous decade, from  
80 7.1% in 2011 to 10.8% in 2021<sup>2</sup>, with as many as 60% of cases undiagnosed<sup>3</sup>. This undiagnosed  
81 population is especially vulnerable to the micro and macrovascular complications of T2DM including  
82 heart attack, stroke, renal failure and retinopathy. Also vulnerable are those with a diagnosis of  
83 T2DM who have not received treatment or whose diabetes remains uncontrolled despite receiving  
84 treatment, although this is a considerably smaller group compared to the undiagnosed population<sup>3</sup>.

85 T2DM incidence and progression is strongly associated with obesity<sup>4</sup> and interventions in high-  
86 income countries such as individualised dietary advice<sup>5</sup> and diets low in fat and refined  
87 carbohydrates<sup>6</sup> have been shown to improve glycaemic control and prevent T2DM complications.  
88 These however are resource intensive and do not consider cultural differences around diet, so are  
89 less generalisable to LMICs, and there is relatively little evidence trialling both individualised and  
90 population-level dietary interventions to reduce T2DM incidence and progression in South African  
91 adults. The prevalence of overweight and obesity in sub-Saharan Africa has risen over the past three  
92 decades and South Africa has the highest obesity rates in the region<sup>7</sup>. These changes, coupled with  
93 poor diabetes screening and surveillance in South Africa, leaves many people vulnerable to T2DM  
94 and its complications.

95 Despite its classification as an upper-middle-income country<sup>8</sup>, the legacy of colonialism and the  
96 devastating apartheid regime means that South Africa has some of the highest rates of

97 socioeconomic and racial inequality globally<sup>9</sup>, which are also reflected in healthcare<sup>3</sup>. Black South  
98 Africans have been shown to have poorer dietary diversity than white South Africans and consume  
99 energy-dense foods from informal vendors more frequently<sup>10</sup>. These findings fall among a wider  
100 backdrop of poor dietary diversity, with the nationally representative SANHANES-1 study reporting a  
101 low intake of fruit and vegetables (two or fewer portions of either) in a quarter of South Africans<sup>11</sup>.  
102 Internal migration may also have an impact on diet. South Africa now has the most urbanised  
103 population in sub-Saharan Africa, with rural-urban migration resulting in 62% living in cities<sup>12</sup>.  
104 Globally, both urban residence and lifetime exposure to urban environments have been associated  
105 with higher incidence of T2DM and being overweight<sup>13</sup>, whilst studies in urban and peri-urban South  
106 Africa have documented dietary composition changing towards the ‘western diet’<sup>12</sup> - a high intake of  
107 energy-dense and nutrient-poor foods and drinks with a low intake of nutrient-dense fresh fruit,  
108 vegetables, lean meat and fish. The obesogenic environment of many urban areas may therefore  
109 predispose to the dual risk of obesity and food insecurity, with intake of energy-dense foods and  
110 features of food insecurity such as childhood stunting seen concurrently within neighbourhoods and  
111 households<sup>14</sup>, creating an additional challenge for healthcare providers and policymakers.

112 The 2016 South African Demographic and Health Survey (SADHS)<sup>15</sup> is a large nationally-  
113 representative survey that additionally collected biomarker samples alongside survey data on a  
114 range of health and social outcomes. The 2016 SADHS estimated that 13% of women and 8% of men  
115 aged over 15 years had poor glycaemic control (glycosylated haemoglobin (HbA1c)  $\geq 6.5\%$ ), despite  
116 only 5% of women and 4% of men reporting a previous diagnosis of diabetes at the time of survey.  
117 Biomarker sampling also showed that 64% of women and 66% of men aged over 15 years had  
118 prediabetes ( $5.7 \leq \text{adjusted HbA1c} \leq 6.4$ )<sup>15</sup>, indicating that a large proportion of the population are at  
119 risk of developing T2DM. Despite this, few statistical analyses of the associations between diabetes  
120 status and diet in South Africa have been conducted, and most studies conducted are highly  
121 localised or population specific. More extensive, biomarker-focused, analysis of population surveys  
122 such as the SADHS may shed more light on dietary differences between sociodemographic groups in  
123 relation to T2DM and inform the design of future public health interventions. This study aims to  
124 investigate whether the odds of a healthy diet differs by diabetes status when controlling for  
125 important sociodemographic variables (research question one), as well as investigating the  
126 association between sociodemographic factors and healthy diet among people living with diabetes  
127 (PLWD) (research question two).

128

129

## 130 **Methods**

### 131 Data Collection

132 Cross-sectional survey and biomarker data from the 2016 SADHS was used with this data collected  
133 between 27th June and 4th November 2016. The survey was administered by Statistics South Africa  
134 and the South African Medical Research Council. The sampling frame for the SADHS was created  
135 using 2011 census enumeration areas (EAs), divided into Primary Sampling Units (PSUs)<sup>15</sup>. The  
136 sampling frame contains information about the geographic type and the estimated number of  
137 residential dwelling units (DUs) in each PSU. The SADHS 2016 followed a stratified two-stage sample  
138 design with probability-proportional-to-size sampling of PSUs at the first stage and systematic  
139 sampling of DUs at the second stage<sup>15</sup>. Women aged over 15 years in odd-numbered DUs were  
140 eligible for the individual questionnaire, whilst both men and women aged over 15 years in even-  
141 numbered DUs were eligible for the individual questionnaire. Participants gave informed verbal  
142 consent for interview which was witnessed by the interviewer and documented in the questionnaire.  
143 Participants aged over 15 years (with no upper age limit) in even-numbered DUs were eligible for  
144 biomarker measurement, including HbA1c, with written consent. For participants aged 15-17,  
145 consent was required from both the participant and their legal parent/guardian. HbA1c was  
146 measured using dried blood spot sampling with  $HbA1c \geq 6.5\%$  indicating diabetes,  $5.7 \leq HbA1c \leq 6.4$   
147 prediabetes and  $HbA1c \leq 5.6$  no diabetes, consistent with WHO<sup>16</sup> and DHS classifications<sup>15</sup>. These  
148 HbA1c classifications were used to define diabetes status in all analyses, are adjusted for sample  
149 type and referred to as 'HbA1c' for the remainder of this paper. Further information can be found in  
150 the SADHS 2016 report<sup>15</sup>. Data was first accessed by the authors on the 20<sup>th</sup> December 2021 and the  
151 authors did not have access to any information that could identify individual participants at any  
152 stage of the analysis.

153 Participant-reported healthy diet group was our categorical outcome measure, with this composite  
154 outcome reflecting extent of healthy diet and calculated from reports of five dietary choices:  
155 consumption of fast-food, fruit, vegetable, sugar-sweetened beverage (SSB) and fruit juice. The  
156 associated 2016 SADHS survey questions, survey answer options and recoding of options into  
157 categories for analyses are contained within table 1. The coding of fruit and vegetable consumption  
158 as high = >2 types/day reflects the national recommendation of five daily portions of fruit and  
159 vegetables<sup>17</sup> (with fruit juice as the 5<sup>th</sup> portion).

160 Healthy choices are high fruit, high vegetable, high fruit juice, low fast-food and low SSB  
161 consumption. Globally, evidence shows that increased fruit and vegetable consumption reduces risk  
162 of cardiovascular diseases<sup>18</sup> that are also associated with T2DM, whilst studies of more resource-

163 intensive interventions have shown that prescribing a diet high in fruit and vegetables and low in fat  
 164 and refined sugar resulted in a significant reduction in fasting glucose and HbA1c<sup>19</sup>. Unhealthy  
 165 choices are low fruit, low vegetable, low fruit juice, high fast-food and high SSB consumption. SSBs  
 166 have a significant dose-dependent association with obesity and T2DM<sup>20</sup> whilst fast-food  
 167 consumption is positively associated with weight gain and obesity<sup>21</sup>. Research into the impact of  
 168 ultra-processed foods (UPFs) on health also showed that SSBs and industrially prepared meals are  
 169 among the leading sources of UPFs, which are collectively associated with an increased incidence of  
 170 T2DM and increased obesity prevalence<sup>22</sup>. Despite being included in the SADHS, interest in lowering  
 171 salt consumption was excluded from this study due to not being a direct indicator of salt  
 172 consumption, whilst fried food consumption was excluded due to its similarity to fast-food  
 173 consumption.

174

175 Table 1. Coding of variables comprising the healthy diet group variable and their corresponding  
 176 SADHS survey question.

| Variable                             | Survey Question                                                                                                                                                                                    | Answer Options                                                | Considered in Analysis as                                                        |
|--------------------------------------|----------------------------------------------------------------------------------------------------------------------------------------------------------------------------------------------------|---------------------------------------------------------------|----------------------------------------------------------------------------------|
| Fast food consumption                | How often do you eat fast-foods or take-away foods from places like Chicken Licken, KFC, Captain DoRego's, Steers, Nando's, McDonalds, pizza delivery, etc?                                        | 'Every day', 'at least once a week', 'occasionally', 'never'. | Binary (high if every day or at least once a week, low if occasionally or never) |
| Fruit consumption                    | Yesterday, how many types of fruit did you eat?                                                                                                                                                    | Continuous variable                                           | Binary (high if $\geq 2$ , low if $< 2$ )                                        |
| Vegetable consumption                | Yesterday, how many types of vegetables, excluding potatoes, did you eat?                                                                                                                          | Continuous variable                                           | Binary (high if $\geq 2$ , low if $< 2$ )                                        |
| Sugar-sweetened beverage consumption | Yesterday, did you drink any sugar-sweetened drinks?<br>Sugar-sweetened drinks include fizzy drinks like Coke or drinks like Squash where water is added, but not diet or unsweetened cold drinks. | Yes/No                                                        | Binary                                                                           |

|                         |                                           |        |        |
|-------------------------|-------------------------------------------|--------|--------|
| Fruit juice consumption | Yesterday, did you drink any fruit juice? | Yes/No | Binary |
|-------------------------|-------------------------------------------|--------|--------|

177

178 Individuals were initially categorised into one of six groups based on their number of healthy dietary  
 179 choices (ranging from five healthy, zero unhealthy to zero healthy, five unhealthy). As there were  
 180 few individuals with zero or five healthy choices, the zero healthy choice and one healthy choice  
 181 groups were combined to create a single unhealthy diet group and the four healthy choices and five  
 182 healthy choices groups were combined to form a single healthy diet group. The two healthy choices  
 183 and three healthy choices groups were retained independently as ‘somewhat healthy’ and  
 184 ‘moderately healthy’ groups respectively, creating a four-group variable of the extent of healthy  
 185 diet.

186 Body mass index (BMI), doctor’s diagnosis of heart attack, doctor’s diagnosis of stroke and doctor’s  
 187 diagnosis of diabetes were chosen as potential individual confounding variables, on the rationale  
 188 that recognition of high BMI and NCD-related diagnoses are opportunities to initiate lifestyle  
 189 change<sup>23</sup>. Additionally, as being diagnosed with diabetes itself is an opportunity to initiate dietary  
 190 change and good glycaemic control, a joint variable combining diabetes status by HbA1c and  
 191 previous diagnosis was created to differentiate individuals with ‘controlled diabetes’, i.e. a diagnosis  
 192 of diabetes, but an HbA1c<6.5% at time of survey. Participants who reported that they did not know  
 193 if they had ever been diagnosed with diabetes (N=31) were excluded from analyses. Participants  
 194 who had not had height and weight measured for BMI to be calculated were retained in analyses  
 195 provided they had a valid HbA1c, with these individuals represented in models as a separate ‘not  
 196 recorded’ BMI category. Age group<sup>24</sup>, gender<sup>24</sup>, ethnicity<sup>11</sup> and type of place of residence  
 197 (urban/rural)<sup>11,25</sup> were included as known demographic risk factors for healthy diet grouping and  
 198 T2DM status. Highest level of education completed<sup>26</sup>, wealth quintile<sup>26</sup>, employment in past 12  
 199 months<sup>26</sup> and health insurance coverage<sup>27</sup> were included as potential socioeconomic confounding  
 200 variables. Demographic and socioeconomic variables were chosen based on their association with  
 201 healthy diet or diabetes status in existing literature. Given the limited number of participants  
 202 reporting doctor’s diagnosis of heart attack and doctor’s diagnosis of stroke, these reports were  
 203 combined to create a single doctor’s diagnosis of heart attack and/or stroke variable, whilst age was  
 204 recoded into three age categories: younger adults (15-34 years), middle-aged adults (35-54 years)  
 205 and older adults (55 years and over).

206

207 Statistical Analysis

208 All analyses were carried out in Stata Standard Edition 17.0 for Windows (StataCorp, 2022).  
209 Descriptive analyses used two-stage sampling weights that accounted for the sampling design. To  
210 visualise clustering of dietary choices within healthy diet groups, we used the UpSetR (v1.4.0)  
211 package<sup>28</sup> in R. Patterns were explored overall and for both genders independently. Two-way tables  
212 with Chi-squared tests were used to investigate the initial association between potential  
213 confounding variables and healthy diet group.

214 As our healthy diet outcome had four ordered categories, we initially used ordered logistic  
215 regression models for the first research question to explore how diabetes status defined by our joint  
216 diabetes status variable was associated with healthy diet. Bivariate analysis explored the  
217 'unadjusted' association of the joint diabetes variable and each other variable of interest with  
218 healthy diet. However, Brant testing identified that several (but not all) of the considered variables  
219 included in bivariate analysis violated the proportional odds assumption (shown in appendix 1). Thus  
220 we moved to fitting generalised ordered logistic regression models using the user-  
221 written **gologit2**, with the "autofit" option allowing the proportional odds assumption to be relaxed  
222 for some explanatory variables while being maintained for others<sup>29</sup>. Reducing to parallel one level of  
223 a variable separately is consistent with previous approaches<sup>30,31</sup>.

224 A multivariable generalised ordered logistic regression model was constructed using a backwards  
225 stepwise approach to add variables significant at the bivariate stage to the model<sup>32</sup>.

226 For the second research question, all individuals with an HbA1c indicating diabetes ( $\geq 6.5\%$ ) were  
227 included in the analysis. We chose to focus on this group because individuals with poor glycaemic  
228 control, regardless of previous diagnosis, are at increased risk of T2DM complications and are a key  
229 population of interest with regard to future public health interventions. Given the large change in  
230 sample size for this subset analysis, we started by exploring univariable associations between  
231 demographic and socioeconomic factors and healthy diet group, before applying the same steps as  
232 for research question one to find the most parsimonious model and investigate whether any  
233 variables violated the proportional odds assumption (these steps are shown in appendix 2).

234

## 235 **Results**

### 236 **Participant Characteristics**

237 The overall sample size of the 2016 SADHS is 10,336 (response rate 81.6%<sup>15</sup>). For the first research  
238 question, 3596 participants were excluded from analysis due to not being selected for biomarker



239 sampling, having an invalid HbA1c sample or having an unknown previous diagnosis of diabetes,  
240 leaving a sample size of 6709, representing 66% (4159) of female participants and 59% (2581) of  
241 male participants<sup>15</sup>.

242 Table 2 shows the distribution of participants by number of healthy choices and further organisation  
243 into healthy diet groups. Most participants demonstrated a mix of healthy and unhealthy dietary  
244 choices, albeit with predominantly unhealthy choices. Nearly half of participants had two healthy  
245 and three unhealthy choices, with the next largest containing those with one healthy and four  
246 unhealthy choices (22.0%). Few participants had an extremely healthy or unhealthy diet with fewer  
247 than 1% making five healthy choices and 3.6% five unhealthy choices.

248

249 Table 2. Distribution of participants by number of healthy dietary choices and  
250 organisation into healthy diet groups.

251

| No. Healthy Choices | Frequency | Percent | Healthy Diet Group |
|---------------------|-----------|---------|--------------------|
| 0                   | 243       | 3.6     | Unhealthy          |
| 1                   | 1474      | 22.0    | Unhealthy          |
| 2                   | 3193      | 47.6    | Somewhat Healthy   |
| 3                   | 1320      | 19.7    | Moderately Healthy |
| 4                   | 415       | 6.2     | Healthy            |
| 5                   | 64        | 0.9     | Healthy            |
| Total               | 6709      | 100.00  |                    |

256 Figure 1 highlights that across all healthy diet groups in both men and women, low fast food  
257 consumption was the dominant healthy choice. Low fruit juice consumption was the dominant  
258 unhealthy choice in both men and women across all healthy diet groups. For those in the somewhat  
259 healthy diet group (those with two healthy choices), low fast food and low SSB consumption was the  
260 most commonly reported combination (54% of all two healthy choice combinations) with this  
261 pattern similar in men and women, whilst high fruit juice and high fruit consumption was least  
262 commonly reported (4%). For those in the moderately healthy diet group (three healthy choices),  
263 low fast food, low SSB and high vegetable consumption was the most commonly reported  
264 combination in both men and women (7.5%) whilst high fruit juice, high fruit and high vegetable  
265 consumption was least commonly reported in both men and women (0.3%).

266 Figure 1: UpSet plots showing patterns of dietary choices among adults aged 15  
267 years and over.

268 Figure 1.1: All adults aged 15 years and over in South Africa (N = 6709)<sup>1,2</sup>

269 <sup>1</sup>● – For example, a participant with only high vegetable, low SSB and low fast food  
 270 consumption would be in the moderately healthy diet group.

271 <sup>2</sup>SSB – sugar-sweetened beverages

272

273 Figure 1.2: Women aged 15 years and over in South Africa (N = 4148)

274

275

276 Figure 1.3: Men aged 15 years and over in South Africa (N = 2560)

277

278 Table 3 summarises weighted participant characteristics by healthy diet group, showing that the  
 279 majority of participants had not previously received a diagnosis of diabetes and that most survey  
 280 participants had an HbA1c indicating prediabetes. Among those who had received a previous  
 281 diagnosis of diabetes, 71.9% had poorly-controlled diabetes ( $HbA1c \geq 6.5$ ) and a further 25.3% had  
 282 somewhat-controlled diabetes ( $5.7\% \leq HbA1c \leq 6.4\%$ ). Of those with no previous diagnosis of  
 283 diabetes, 8.7% had diabetes ( $HbA1c \geq 6.5$ ) and 66.3% had prediabetes.

| Variable                                                                        | Unhealthy   | Somewhat Healthy | Moderately Healthy | Healthy   |              | P-value <sup>3</sup> |
|---------------------------------------------------------------------------------|-------------|------------------|--------------------|-----------|--------------|----------------------|
|                                                                                 | N (row %)   | N (row %)        | N (row %)          | N (row %) | N (col%)     |                      |
| Joint Diabetes Status Variable                                                  |             |                  |                    |           |              | <0.01                |
| No Diabetes (No previous diabetes diagnosis and $HbA1c < 5.7\%$ )               | 447 (28.1)  | 741 (46.6)       | 294 (18.5)         | 109 (6.8) | 1591(23.7)   |                      |
| Prediabetes (No previous diabetes diagnosis and $5.7\% \leq HbA1c \leq 6.4\%$ ) | 1105 (26.1) | 1999 (47.1)      | 847 (20.0)         | 290 (6.8) | 4241 (63.20) |                      |
| Diabetes (No previous diabetes diagnosis and $HbA1c \geq 6.5$ )                 | 119 (21.3)  | 288 (51.4)       | 110 (19.6)         | 43 (7.7)  | 560 (8.4)    |                      |
| Controlled Diabetes (Previous diabetes diagnosis)                               | 2 (22.2)    | 5 (55.6)         | 1 (11.1)           | 1 (11.1)  | 9(0.1)       |                      |

284

285 Table 3. Distribution of Healthy Diet categories by characteristics of survey participants<sup>1,2</sup>

|                                                                                   |               |               |               |            |          |       |
|-----------------------------------------------------------------------------------|---------------|---------------|---------------|------------|----------|-------|
| and HbA1c <5.7%)                                                                  |               |               |               |            |          |       |
| Somewhat-Controlled Diabetes (Previous diabetes diagnosis and 5.7% ≤HbA1c ≤ 6.4%) | 11 (13.8)     | 45 (56.2)     | 14 (17.5)     | 10 (12.5)  | 80(1.2)  |       |
| Uncontrolled Diabetes (Previous diabetes diagnosis and HbA1c ≥ 6.5)               | 33 (14.5)     | 115 (50.4)    | 54 (23.7)     | 26 (11.4)  | 228(3.4) |       |
|                                                                                   |               |               |               |            |          |       |
| Body Mass Index                                                                   |               |               |               |            |          | <0.01 |
| Underweight or Normal Weight                                                      | 820 (26.0%)   | 1,575 (50.0%) | 587 (18.6%)   | 169 (5.4%) |          |       |
| Overweight                                                                        | 430 (26.9%)   | 717 (44.9%)   | 322 (20.2%)   | 128 (8.0%) |          |       |
| Obese                                                                             | 444 (23.6%)   | 863 (45.8%)   | 397 (21.1%)   | 180 (9.6%) |          |       |
| Not Recorded                                                                      | 23 (29.9%)    | 38 (49.4%)    | 14 (18.2%)    | 2 (2.6%)   |          |       |
|                                                                                   |               |               |               |            |          |       |
| Diagnosis of Heart Attack and/or Stroke                                           |               |               |               |            |          | 0.02  |
| No                                                                                | 1,662 (25.9%) | 3,044 (47.4%) | 1,264 (19.7%) | 450 (7.0%) |          |       |
| Yes                                                                               | 55 (19.0%)    | 149 (51.6%)   | 56 (19.4%)    | 29 (10.0%) |          |       |
|                                                                                   |               |               |               |            |          |       |
| Gender                                                                            |               |               |               |            |          | <0.01 |
| Male                                                                              | 744 (29.1%)   | 1,179 (46.1%) | 477 (18.6%)   | 160 (6.3%) |          |       |
| Female                                                                            | 974 (23.5%)   | 2,014 (48.5%) | 843 (20.3%)   | 319 (7.7%) |          |       |
|                                                                                   |               |               |               |            |          |       |
| Age Group                                                                         |               |               |               |            |          | <0.01 |
| Young Adults (15-34 years)                                                        | 1,030 (31.9%) | 1,423 (44.1%) | 581 (18.0%)   | 195 (6.0%) |          |       |
| Middle-Aged Adults (35-54 years)                                                  | 446 (23.5%)   | 919 (48.5%)   | 382 (20.2%)   | 148 (7.8%) |          |       |
| Older Adults (55+ years)                                                          | 241 (15.2%)   | 851 (53.7%)   | 357 (22.5%)   | 136 (8.6%) |          |       |
|                                                                                   |               |               |               |            |          |       |
| Type of Place of Residence                                                        |               |               |               |            |          | <0.01 |

|                                                        |                  |               |               |             |  |       |
|--------------------------------------------------------|------------------|---------------|---------------|-------------|--|-------|
| Urban                                                  | 882 (26.2%)      | 1,481 (44.1%) | 703 (20.9%)   | 296 (8.8%)  |  |       |
| Rural                                                  | 835 (24.9%)      | 1,712 (51.2%) | 617 (18.4%)   | 183 (5.5%)  |  |       |
|                                                        |                  |               |               |             |  |       |
| Ethnicity                                              |                  |               |               |             |  | <0.01 |
| Black African                                          | 1,575<br>(26.5%) | 2,884 (48.6%) | 1,106 (18.6%) | 374 (6.3%)  |  |       |
| White                                                  | 21 (8.8%)        | 72 (30.3%)    | 83 (34.9%)    | 62 (26.1%)  |  |       |
| Coloured                                               | 116 (24.2%)      | 214 (44.6%)   | 115 (24.0%)   | 35 (7.3%)   |  |       |
| Indian/Asian/other                                     | 5 (9.6%)         | 23 (44.2%)    | 16 (30.8%)    | 8 (15.4%)   |  |       |
|                                                        |                  |               |               |             |  |       |
| Highest Level of Education Completed                   |                  |               |               |             |  | <0.01 |
| No Education                                           | 104 (17.3%)      | 363 (60.3%)   | 103 (17.1%)   | 32 (5.3%)   |  |       |
| Primary                                                | 297 (22.2%)      | 738 (55.3%)   | 237 (17.8%)   | 63 (4.7%)   |  |       |
| Secondary                                              | 1,174<br>(27.6%) | 1,933 (45.5%) | 845 (19.9%)   | 296 (7.0%)  |  |       |
| Higher                                                 | 142 (27.1%)      | 159 (30.3%)   | 135 (25.8%)   | 88 (16.8%)  |  |       |
|                                                        |                  |               |               |             |  |       |
| Wealth Quintile                                        |                  |               |               |             |  | <0.01 |
| Poorest                                                | 341 (22.4%)      | 863 (56.7%)   | 264 (17.3%)   | 54 (3.5%)   |  |       |
| Poorer                                                 | 398 (27.0%)      | 733 (49.8%)   | 255 (17.3%)   | 87 (5.9%)   |  |       |
| Middle                                                 | 458 (28.8%)      | 745 (46.8%)   | 299 (18.8%)   | 90 (5.7%)   |  |       |
| Richer                                                 | 329 (25.2%)      | 566 (43.3%)   | 286 (21.9%)   | 125 (9.6%)  |  |       |
| Richest                                                | 191 (23.4%)      | 286 (35.0%)   | 216 (26.5%)   | 123 (15.1%) |  |       |
|                                                        |                  |               |               |             |  |       |
| Employment in Last 12 Months                           |                  |               |               |             |  | <0.01 |
| Unemployed Last 12 Months                              | 982 (22.9%)      | 2,192 (51.1%) | 829 (19.3%)   | 289 (6.7%)  |  |       |
| Employed in Last 12 Months, but not currently employed | 113 (34.7%)      | 138 (42.3%)   | 62 (19.0%)    | 13 (4.0%)   |  |       |
| Currently employed <sup>4</sup>                        | 622 (29.7%)      | 863 (41.3%)   | 429 (20.5%)   | 177 (8.5%)  |  |       |
|                                                        |                  |               |               |             |  |       |

|                             |                  |               |               |             |  |       |
|-----------------------------|------------------|---------------|---------------|-------------|--|-------|
| Covered by Health Insurance |                  |               |               |             |  | <0.01 |
| No                          | 1,516<br>(25.6%) | 2,937 (49.7%) | 1,116 (18.9%) | 340 (5.8%)  |  |       |
| Yes                         | 201 (25.1%)      | 256 (32.0%)   | 204 (25.5%)   | 139 (17.4%) |  |       |

286

287 <sup>1</sup> Survey weighting is applied.

288 <sup>2</sup> N=6709

289 <sup>3</sup> Chi-square p-values.

290 <sup>4</sup> 'Currently employed' includes participants who did not work in the past 7 days, but who  
 291 are regularly employed and absent from work due to leave, illness, vacation or any other  
 292 such reason<sup>15</sup>.

293

294 Appendix 1 shows results of bivariate ordered logistic analyses conducted for research question 1.

295 On bivariate analysis, education showed no pattern of association with diabetes status or healthy  
 296 diet group and was dropped. Diagnosis of heart attack/stroke was also dropped at this stage as too  
 297 few individuals reported a diagnosis and it could not be considered for inclusion in multivariate  
 298 models. As expected, having a previous diagnosis of diabetes was associated with higher odds of  
 299 being in a healthier diet group relative to individuals without a diagnosis of diabetes (OR 1.83, CI  
 300 1.42 – 2.35 for those with uncontrolled diabetes, OR 1.66, CI 1.11 – 2.51 for those with somewhat-  
 301 controlled diabetes). Among other significant associations, individuals with black African ethnicity  
 302 had much lower odds of being in a healthier diet group relative to individuals with other ethnicities  
 303 (OR of being in a healthier diet group 4.43, CI 2.64 – 7.45 for white individuals, OR 1.31, CI 1.01 –  
 304 1.69 for coloured individuals and OR 2.53, CI 1.22 – 5.22 for Indian/Asian individuals) and individuals  
 305 covered by health insurance had higher odds of being in a healthier diet group relative to individuals  
 306 without health insurance (OR 1.48, CI 1.05 – 1.09).

307 Likelihood ratio testing of variable contribution at the bivariate stage found that all variables other  
 308 than type of place of residence and BMI had a p-value<0.10, and were therefore considered in  
 309 building of the multivariable model. Brant testing of remaining variables at the bivariate stage  
 310 determined that age, wealth index, employment status in the last 12 months and health insurance  
 311 coverage violated the parallel odds assumption.

312 Table 4 shows results of the final multivariable generalised ordered logistic regression model with  
 313 the joint diabetes status variable, gender, ethnicity and employment in last 12 months reduced to  
 314 parallel. Individuals with a previous diagnosis of diabetes and uncontrolled diabetes (HbA1c ≥ 6.5)  
 315 remained significantly more likely to be in a healthier diet group compared to individuals without

316 diabetes (OR 2.14, CI 1.10 – 4.18). No other category of our joint diabetes status variable was  
 317 statistically significantly different in odds of a healthier diet compared to the base group with no  
 318 diabetes (no previous diagnosis and an HbA1c<5.7%), although the estimate for the somewhat  
 319 controlled is in the same direction while numbers contributing to the controlled diabetes group  
 320 estimate are very small (N=18). Middle-aged and older adults had significantly greater odds of being  
 321 in the somewhat healthy, moderately healthy or healthy diet groups than the unhealthy diet group  
 322 relative to younger adults (OR 1.54, CI 1.28-1.86 for middle aged adults; OR 2.06, CI 1.23-3.43 for  
 323 older adults). This association is attenuated and becomes statistically insignificant when comparing  
 324 individuals in the unhealthy and somewhat healthy diet groups to those in the moderately healthy  
 325 and healthy diet groups by age (OR 1.04, CI 0.86 – 1.27 for middle aged adults, OR 1.22, CI 0.77 –  
 326 1.95 for older adults).

327 Individuals with black African ethnicity remained significantly less likely to have healthy diet than all  
 328 other ethnicities. There was a u-shaped relationship between wealth quintile and diet, with all  
 329 wealth quintiles more likely to be in the unhealthy diet group than the healthy, moderately healthy  
 330 or somewhat healthy diet groups relative to the poorest quintile, but higher wealth quintiles having  
 331 an increasingly higher likelihood of being in the healthy diet group than the moderately healthy,  
 332 somewhat healthy or unhealthy diet group compared to the poorest quintile, with this being  
 333 significant for the richest wealth quintile (OR 1.95, CI 1.10-3.46). Individuals who were employed in  
 334 the last 12 months but were currently unemployed were significantly less likely to have a healthy  
 335 diet relative to those unemployed throughout the last 12 months (OR 0.66, CI 0.50-0.88), whilst  
 336 those currently employed were significantly more likely to be in the unhealthy diet group (OR 0.76,  
 337 CI 0.64-0.90).

338

339 Table 4. Final multivariable generalised ordered logistic regression model for the  
 340 odds of healthy diet.

| Variable                                                                | Healthy Diet Group <sup>1</sup> |                      |                      |
|-------------------------------------------------------------------------|---------------------------------|----------------------|----------------------|
|                                                                         | Unhealthy                       | Somewhat Healthy     | Moderately Healthy   |
| Variable                                                                | Adjusted OR (95% CI)            | Adjusted OR (95% CI) | Adjusted OR (95% CI) |
| <b>Joint Diabetes Status Variable</b>                                   |                                 |                      |                      |
| (Base: No diabetes (no previous diagnosis of diabetes and HbA1c< 5.7%)) |                                 |                      |                      |
| Prediabetes (No previous diabetes)                                      | 1.05 (0.91-1.21) <sup>2</sup>   |                      |                      |

|                                                                                   |                                        |                  |                           |
|-----------------------------------------------------------------------------------|----------------------------------------|------------------|---------------------------|
| diagnosis and 5.7% ≤HbA1c ≤ 6.4%)                                                 |                                        |                  |                           |
| Diabetes (No previous diabetes diagnosis and HbA1c ≥ 6.5)                         | 0.92 (0.68-1.23)                       |                  |                           |
| Controlled diabetes (Previous diabetes diagnosis and HbA1c<5.7)                   | 0.78 (0.14-4.25)                       |                  |                           |
| Somewhat-controlled diabetes (Previous diabetes diagnosis and 5.7% ≤HbA1c ≤ 6.4%) | 1.35 (0.70-2.61)                       |                  |                           |
| Uncontrolled diabetes (Previous diabetes diagnosis and HbA1c ≥ 6.5)               | 2.14 <sup>3</sup> ( <b>1.10-4.18</b> ) |                  |                           |
| <b>Gender</b>                                                                     |                                        |                  |                           |
| (Base male)                                                                       |                                        |                  |                           |
| Female                                                                            | 1.03 (0.88-1.20) <sup>2</sup>          |                  |                           |
| <b>Age Group</b>                                                                  |                                        |                  |                           |
| (Base young adults)                                                               |                                        |                  |                           |
| Middle-aged adults                                                                | 1.54 <sup>4</sup> ( <b>1.28-1.86</b> ) | 1.04 (0.86-1.27) | 0.90 (0.66-1.22)          |
| Older adults                                                                      | 2.07 ( <b>1.24-3.44</b> )              | 1.22 (0.77-1.95) | 0.58 (0.25-1.38)          |
| <b>Ethnicity</b>                                                                  |                                        |                  |                           |
| (Base black African)                                                              |                                        |                  |                           |
| White                                                                             | 3.29 ( <b>2.01-5.40</b> ) <sup>2</sup> |                  |                           |
| Coloured                                                                          | 1.23 (0.96-1.59)                       |                  |                           |
| Indian/Asian/Other                                                                | 2.36 ( <b>1.06-5.25</b> )              |                  |                           |
| <b>Wealth Quintile</b>                                                            |                                        |                  |                           |
| (Base poorest)                                                                    |                                        |                  |                           |
| Poorer                                                                            | 0.64 ( <b>0.51-0.82</b> )              | 0.99 (0.76-1.29) | 1.23 (0.77-1.95)          |
| Middle                                                                            | 0.64 ( <b>0.50-0.81</b> )              | 1.07 (0.80-1.43) | 1.58 (0.92-2.72)          |
| Richer                                                                            | 0.68 ( <b>0.52-0.90</b> )              | 1.32 (0.94-1.85) | 1.70 (0.99-2.93)          |
| Richest                                                                           | 0.67 ( <b>0.47-0.96</b> )              | 1.17 (0.78-1.73) | 1.93 ( <b>1.09-3.43</b> ) |
| <b>Employment in last 12 months</b>                                               |                                        |                  |                           |
| (Base unemployed during last 12 months)                                           |                                        |                  |                           |
| Worked in last 12 months, but not currently working                               | 0.67 ( <b>0.50-0.88</b> ) <sup>2</sup> |                  |                           |
| Currently working                                                                 | 0.76 ( <b>0.64-0.90</b> )              | 1.00 (0.81-1.22) | 1.17 (0.82-1.67)          |
| <b>Health insurance coverage</b>                                                  |                                        |                  |                           |

|           |                  |                  |                  |
|-----------|------------------|------------------|------------------|
| (Base no) |                  |                  |                  |
| Yes       | 0.83 (0.63-1.08) | 1.36 (0.96-1.93) | 1.46 (0.93-2.31) |

341

342 <sup>1</sup>Uses most healthy diet group as referent.

343 <sup>2</sup>Variable reduced to parallel, therefore one adjusted OR and CI used across all levels.

344 <sup>3</sup>As exemplar of interpretation when parallel odds is assumed, when controlling for all other  
 345 variables, individuals with a previous diagnosis of diabetes and uncontrolled diabetes by HbA1c  
 346 were on average 2.14 times more likely to be in a healthier diet group, compared to individuals with  
 347 no previous diagnosis of diabetes and an HbA1c <5.7%.

348 <sup>4</sup>As exemplar of interpretation when parallel odds is not assumed, middle-aged adults were 1.54  
 349 times more likely to be in the somewhat healthy, moderately healthy or healthy diet group than the  
 350 unhealthy diet group compared to young adults, when controlling for all other variables, but were  
 351 1.04 times more likely to be in the healthy or moderately healthy diet groups than the somewhat  
 352 healthy or unhealthy diet group compared to young adults.

353

### 354 **People Living With Diabetes**

355 The distribution of individuals with uncontrolled diabetes defined by HbA1c , irrespective of previous  
 356 diagnosis, was broadly similar to in the general population, with the exceptions that individuals with  
 357 three healthy and two unhealthy choices were the second largest group rather than the third largest  
 358 among PLWD. Overall, the distribution of PLWD by sociodemographic status was similar to that in  
 359 the general population. This can be further seen in appendix 2.

360 Likelihood ratio testing found that employment status, education status, ethnicity and type of place  
 361 of residence had a p-value>0.10 and these variables were dropped. Further likelihood ratio testing  
 362 was conducted on smaller models in a backwards stepwise manner as for research question one.  
 363 Age, gender, wealth quintile and health insurance coverage were retained for further analyses after  
 364 this testing. Brant testing of the final ordered logistic regression model showed that none of the  
 365 included variables violated the parallel odds assumption, meaning the ordered logistic regression  
 366 model was retained, as seen in appendix 3.

367 Table 5 shows results from the final ordered logistic regression model of healthy diet among PLWD.  
 368 When controlling for other variables, females living with diabetes were significantly more likely than  
 369 males to be in a healthier diet group (OR 1.40, CI 1.03-1.90). Middle-aged adults were no more likely  
 370 than younger adults to be in a healthier diet group, however older adults were borderline  
 371 significantly more likely to be in a healthier diet group than younger adults, (OR 1.55, CI 0.99-2.43).  
 372 Those in the richer (OR 1.63, CI 1.06-2.51) and richest (OR 1.85, CI 1.14-3.02) quintiles were



373 significantly more likely to be in a healthier diet group relative to the poorest group. Health  
 374 insurance coverage, holding wealth quintile and all other factors constant, showed an independent  
 375 statistically significant association with healthy diet group - those with coverage were almost twice  
 376 as likely as those without coverage to have a healthier diet (OR 1.96, CI 1.27-3.01).

377

378 Table 5. Final Multivariable ordered logistic regression model of healthy diet among  
 379 people living with diabetes<sup>1,2</sup>.

| Variable                         | Likelihood Ratio<br>Test P-Value | Odds Ratio        | 95% Confidence<br>Interval |
|----------------------------------|----------------------------------|-------------------|----------------------------|
| Previous Diagnosis of Diabetes   | (Variable of interest)           |                   |                            |
| No                               |                                  |                   | (Base)                     |
| Yes                              |                                  | 1.14              | 0.83 – 1.55                |
|                                  |                                  |                   |                            |
| Gender                           | 0.04                             |                   |                            |
| Male                             |                                  |                   | (Base)                     |
| Female                           |                                  | 1.40 <sup>1</sup> | <b>1.03 – 1.90</b>         |
|                                  |                                  |                   |                            |
| Age Group                        | <0.01                            |                   |                            |
| Young adults                     |                                  |                   | (Base)                     |
| Middle-Aged Adults (34-54 years) |                                  | 1.03              | 0.64 – 1.65                |
| Older Adults (55+)               |                                  | 1.55              | 0.99 – 2.43                |
|                                  |                                  |                   |                            |
| Wealth Quintile                  | 0.04                             |                   |                            |
| Poorest                          |                                  |                   | (Base)                     |
| Poorer                           |                                  | 1.12              | 0.73 – 1.70                |
| Middle                           |                                  | 1.21              | 0.79 – 1.83                |
| Richer                           |                                  | 1.63              | <b>1.06 – 2.51</b>         |
| Richest                          |                                  | 1.85              | <b>1.14 – 3.02</b>         |
|                                  |                                  |                   |                            |
| Covered by Health Insurance      | <0.01                            |                   |                            |
| No                               |                                  |                   | (Base)                     |
| Yes                              |                                  | 1.96              | <b>1.27 – 3.01</b>         |

380

381 <sup>1</sup>Females were 1.37 times more likely to be in a healthier diet group than males, when controlling for  
382 all other variables.

383 <sup>2</sup>N=788.

384

## 385 **Discussion**

386 Having both a previous diagnosis of diabetes and an HbA1c at the time of survey indicating  
387 uncontrolled diabetes was associated with a healthier diet, whilst having an HbA1c indicating  
388 diabetes, but no previous diagnosis of diabetes was not associated with healthy diet group after  
389 controlling for other variables. Given the role of diagnosis as an opportunity for discussing,  
390 facilitating and motivating lifestyle change<sup>23</sup>, this difference illustrates that the large number of  
391 individuals with undiagnosed diabetes are at increased risk of continuing to make unhealthy dietary  
392 choices. Although the majority of individuals with a diagnosis of diabetes still had poor glycaemic  
393 control, it may be the case that diet change alone was insufficient to induce glycaemic control in this  
394 group, whilst care cascade data reported that almost half of individuals receiving treatment still have  
395 uncontrolled diabetes (HbA1c $\geq$ 6.5%)<sup>3</sup>. Existing literature shows that black ethnicity and low socio-  
396 economic status (SES) are predictors of undiagnosed diabetes<sup>26</sup> and poor healthcare access<sup>33</sup>, whilst  
397 our results also show they are associated with unhealthy diet among both PLWD and the general  
398 population. This means PLWD in sociodemographic groups more likely to have unhealthy diet prior  
399 to diagnosis of diabetes are also less likely to have access to healthcare professionals who can help  
400 to motivate lifestyle change, in addition to being economically less able to introduce them, placing  
401 this group at increased risk of T2DM complications. Encouragingly, early NCD detection in primary  
402 care settings is included as a strategic action area in the new 2020-2025 NCD plan created by the  
403 South African Department of Health (SADOH)<sup>34</sup>. Planned strategies include the development and  
404 review of a diabetes cascade system to mirror the structure used for HIV management, training  
405 community health workers to conduct diabetes screening and advocating for T2DM screening to be  
406 covered by national health insurance. Integrating T2DM screening with improved provision of  
407 lifestyle counselling and education in primary care widens access to appropriate diabetes diagnosis  
408 and management and may bring about healthier dietary choices among PLWD.

409 The pattern of concurrent low fruit, fruit juice and vegetable consumption seen among both the  
410 general population and PLWD is a common issue observed in South African population studies<sup>11,25,35</sup>.  
411 Although these studies are limited by their cross-sectional nature, longitudinal data from a repeat

412 panel study by Ronquest-Ross et al<sup>36</sup> found low fruit and vegetable consumption at baseline and  
413 showed a 7.9% reduction in vegetable consumption from 42.0 to 38.7 kg/capita/year, albeit a 6.4%  
414 increase in fruit consumption 28.1 to 29.9 kg/capita/year between 1999 and 2012. Although low  
415 fruit and vegetable intake is a global problem<sup>36</sup>, it is of particular concern in South Africa and other  
416 LMICs due to the rapid and unplanned nature of urban population growth<sup>12</sup>, general increases in the  
417 cost of living<sup>37</sup> and unemployment<sup>38</sup>, and rapidly rising levels of NCDs against which fruit and  
418 vegetables are protective. Although this study found low rates of SSB consumption, their intake  
419 among the general population in South Africa increased by 68.9% from 55 L/capita/year to 92.9  
420 L/capita/year between 1994 and 2012<sup>36</sup>.

421 Analysis in both the general population and PLWD found an association between older age and  
422 healthier diet group. Older age has previously been associated with higher fruit and vegetable  
423 consumption<sup>25</sup> and qualitative research has suggested that older populations may have a greater  
424 preference for vegetables relative to younger individuals<sup>39</sup>. In contrast with these results, research  
425 involving PLWD recruited at hospital clinics found no association between age and healthier diet<sup>40</sup>.  
426 Given that NCDs seen primarily in older individuals are already increasing in prevalence, evidence  
427 that dietary quality is decreasing in younger age groups, combined with the high rate of prediabetes  
428 seen in this study, is concerning as it confirms predictions<sup>1,2</sup> that the burden of T2DM will continue  
429 to grow without urgent action.

430 This study and more localised research<sup>40</sup> found that women with T2DM had a healthier diet than  
431 men. These findings also fit into wider patterns of demographic transition in South Africa which  
432 show that men have an increasingly more equal risk of obesity<sup>41</sup>, as well as a greater chance of being  
433 physically inactive compared to women<sup>42</sup>, and point towards the future burden of NCDs becoming  
434 higher among men, as in high-income countries<sup>2</sup>, with females having lower albeit still burdensome  
435 rates of complications.

436 Despite historic links between ethnicity and wealth in South Africa, we found that lower wealth and  
437 black African ethnicity were both independently associated with a less healthy diet. This suggests  
438 that the socioeconomic effects of apartheid extend further than wealth alone, but also impact  
439 individuals' food environment. Previous literature has shown that those with lower wealth have  
440 poorer dietary diversity<sup>40</sup>, as well as reduced fruit and vegetable consumption<sup>25</sup>. Qualitative and  
441 quantitative studies have proposed that this is due to the high cost of fresh fruit and vegetables<sup>11,39</sup>,  
442 with affordability the most important factor for South Africans when making dietary choices<sup>34</sup>. Our  
443 results additionally noted an increased likelihood of having unhealthy diet for those in higher wealth  
444 quintiles relative to the poorest, which could be explained by the inclusion of fast-food consumption

445 in our models, which is higher among those with white ethnicity and higher SES<sup>10</sup>. This would  
446 indicate that unlike in high-income countries, where those in more deprived areas have greater  
447 exposure to fast-food and takeaway outlets<sup>43</sup>, fast-food is currently more popular among South  
448 Africans with higher SES.

449 These findings, as well as existing evidence, suggest that future public health interventions and  
450 policies should focus on making fruit and vegetables more accessible, particularly to younger,  
451 majority black populations with low SES. The SADOH NCD plan includes the intention to make  
452 healthy foods more available and affordable, but identifies few specific target populations or  
453 policies. Participation in a previous intervention giving 25% cashback on healthy dietary purchases  
454 was associated with an increase in fruit and vegetable consumption and a decrease in sugary and  
455 fast-foods<sup>43</sup>, but was only available to members of a private health insurance company and  
456 therefore targeted a demographic already more likely to have the means to purchase healthier  
457 foods. Targeted government-funded interventions have so far only focused on providing nutritious  
458 meals and health education for school age children<sup>44</sup>, although these interventions do use schools as  
459 a conduit for educating parents and families. Whilst this is valuable given the rising rates of  
460 childhood obesity reported recently<sup>7</sup>, qualitative evidence shows that people in low-income areas  
461 are often aware of the implications of unhealthy diet<sup>39,45,46</sup> and more work is therefore needed to  
462 create a more enabling food environment in such areas. Research has also documented overly  
463 simplistic, and even shaming, advice from healthcare professionals in regard to improving diet<sup>46</sup> and  
464 there is a need for additional recognition of environmental barriers when motivating lifestyle change  
465 in healthcare settings. A tax on SSBs was recently introduced in South Africa alongside a levy on fruit  
466 juice, with SSBs subsequently increasing in price<sup>47</sup>. Whilst this could serve as a model for similar  
467 policies on foods, no relative price decrease was detected for healthier beverages and so more far-  
468 reaching policies may be required to reduce the cost and increase availability of healthy foods and  
469 avoid exacerbating food insecurity among low SES households.

470 Whilst South Africa's population sub-groups and history make racial and socioeconomic inequalities  
471 particularly entrenched, these findings remain increasingly generalisable to other LMICs as the  
472 global epidemiological and nutritional transitions continue. Obesity rates in all Southern Africa  
473 Development Community Countries increased between 1990 and 2019<sup>7</sup>, whilst rates of urbanisation  
474 in LMICs are also rising more rapidly than in high-income countries<sup>13</sup>. This indicates that many of the  
475 challenges faced by South Africa will also be faced by other LMICs in future years and whilst  
476 morbidity and mortality attributed to T2DM remains lower in other areas of sub-Saharan Africa<sup>1</sup>,  
477 rates are beginning to increase. Proactive strategies for prevention and treatment of T2DM will

478 therefore be needed in many LMICs to address the future burden of disease, including those  
479 addressing dietary risk factors.

480

#### 481 Strengths and Limitations

482 The large, nationally representative sample size of the SADHS is a strength of this study, as is the  
483 number of available variables, which allows for consideration of multiple dietary groups and  
484 potential confounding factors. Using Hba1c as the primary measure of diabetes status rather than  
485 self-reported diagnosis is biologically objective and enables the inclusion of individuals with  
486 undiagnosed diabetes, although it is an indirect measure of blood glucose and utilises only one  
487 measurement, making it less reliable than a fasting glucose test<sup>48</sup>. The use of generalised ordered  
488 and ordered logistic regression models the hierarchical nature of healthy diet groups. To the  
489 authors' knowledge, this is the first study to use such modelling to investigate the associations  
490 between diabetes status and diet.

491 The cross-sectional nature of the SADHS is a limitation and means it was not possible to assess  
492 changes over time. Four out of five dietary variables only considered consumption during the  
493 previous day, limiting the representativeness of the survey as a consistent measure of individual  
494 dietary choices. The low number of individuals in the healthy diet group limited statistical power  
495 when comparing with this group, whilst the use of a nationally representative sample meant that  
496 sample sizes for minority groups, such as the Indian/Asian and elderly populations were small. Given  
497 the low number of individuals reporting fruit juice consumption, including this with fruit and  
498 vegetable consumption to create a binary variable of 5+ vs <5 portions of fruit and vegetables per  
499 day (reflecting national recommendations) may have improved statistical power. Other variables  
500 associated with healthier dietary outcomes in the literature, such as increased grocery expenditure<sup>25</sup>  
501 and increased time spent cooking<sup>43</sup>, were not collected in the 2016 SADHS and could not be  
502 considered in these analyses. Whilst the prevalences of other types of diabetes mellitus in South  
503 Africa are very small relative to T2DM<sup>1,49</sup>, the SADHS does not differentiate between types of  
504 diabetes.

505 Our findings, in combination with existing evidence, should inform the development of actionable  
506 public health policies in South Africa, with a particular focus on improving fruit and vegetable  
507 consumption in younger, black and low-SES populations without access to health insurance clearly  
508 required. Key healthcare stakeholders including the South African government, non-government  
509 organisations and health insurance providers should integrate T2DM screening with individualised

510 lifestyle management, as well as population-level interventions, to combat the rising burden of the  
511 disease.

512

## 513 **Declarations:**

### 514 **Human Ethics and Consent to Participate**

515 Ethical approval was received from the Faculty of Medicine Ethics Committee, University of  
516 Southampton, under approval number 66804.

517 Participants gave informed verbal consent to give survey data and informed written consent to give  
518 biomarker data to the SADHS. All data used in this paper is anonymised. For participants aged 15-17,  
519 consent was required from both the participant and their legal parent/guardian.

520 All research was conducted in accordance with the Declaration of Helsinki.

### 521 **Consent for Publication:**

522 Not applicable

### 523 **Author's Contribution:**

524 MB was responsible for study design and data analysis under guidance from NM. Survey and  
525 biomarker data was collected by the Demographic and Health Survey program, who gave approval  
526 to the authors for use in this study.

### 527 **Acknowledgements:**

528 The authors would also like to thank Dr Beth Stuart for some additional guidance of statistical model  
529 choice and Dr Zhixin Feng for guidance on variable weighting.

530

## 531 **References**

532 1: GBD 2016 Causes of Death Collaborators., Global, regional and national life expectancy, all cause  
533 mortality, and cause specific mortality for 249 causes of death, 1980-2015: a systematic analysis for  
534 the Global Burden of Disease Study 2015. *Lancet*, 2017. 390: 1151-1210.

535 2: International Diabetes Federation. IDF Diabetes Atlas 2021.  
536 [https://diabetesatlas.org/atlas/tenthedition/?dlmodal=active&dlsrc=https%3A%2F%2Fdiabetesatlas.org%2Fidfawp%2Fresource-files%2F2021%2F07%2FIDF\\_Atlas\\_10th\\_Edition\\_2021.pdf](https://diabetesatlas.org/atlas/tenthedition/?dlmodal=active&dlsrc=https%3A%2F%2Fdiabetesatlas.org%2Fidfawp%2Fresource-files%2F2021%2F07%2FIDF_Atlas_10th_Edition_2021.pdf), accessed  
537 24/05/2022.  
538

539 3: Stokes, A., et al., Prevalence and unmet need for diabetes care across the care continuum in a  
540 national sample of South African adults: Evidence from the SANHANES-1, 2011-2012. *PLoS One*,  
541 2017. 12(10): e0184264.

- 542 4: Kahn, S.E., et al., Mechanisms linking obesity to insulin resistance and type 2 diabetes. *Nature*,  
543 2006. 444: 840-846.
- 544 5: Guess, N.D., Dietary Interventions for the Prevention of Type 2 Diabetes in High-Risk Groups:  
545 Current State of Evidence and Future Research Needs. *Nutrients*, 2018. 10(9): 1245.
- 546 6: Copell, K.J., et al., Nutritional intervention in patients with type 2 diabetes who are  
547 hyperglycaemic despite optimised drug treatment – Lifestyle Over and Above Drugs in Diabetes  
548 (LOADD) study: randomised controlled trial. *BMJ*, 2010. 341: c3337.
- 549 7: Gona, P.N., et al., Changes in body mass index, obesity, and overweight in Southern Africa  
550 development countries, 1990 to 2019: Findings from the Global Burden of Disease, Injuries, and Risk  
551 Factors Study. *Obesity Science and Practice*, 2021. 2021: 01-16.
- 552 8: World Bank. World Bank Country and Lending Groups.  
553 [https://datahelpdesk.worldbank.org/knowledgebase/articles/906519-world-bank-country-and-](https://datahelpdesk.worldbank.org/knowledgebase/articles/906519-world-bank-country-and-lending-groups)  
554 [lending-groups](https://datahelpdesk.worldbank.org/knowledgebase/articles/906519-world-bank-country-and-lending-groups), accessed 24/04/2022.
- 555 9: World Inequality Lab. World Inequality Report 2022.  
556 [https://wir2022.wid.world/wwsite/uploads/2021/12/WorldInequalityReport2022\\_Full\\_Report.pdf](https://wir2022.wid.world/wwsite/uploads/2021/12/WorldInequalityReport2022_Full_Report.pdf)  
557 accessed 24/04/2022.
- 558 10: Steyn, N.P., et al., Factors which influence the consumption of street foods and fast foods in  
559 South Africa-a national survey. *Nutrition Journal*, 2011. 10: 104.
- 560 11: Shisana, O., et al., South African Health and Nutrition Examination Survey (SANHANES-1). *HSRC*  
561 *Press*, 2013.
- 562 12: Oni, T., et al., Patterns of HIV, TB and non-communicable disease multi-morbidity in peri-urban  
563 South Africa – a cross sectional study. *BMC Infectious Diseases*, 2015. 15: 20.
- 564 13: Eckert, S., Kohler, S., Urbanisation and health in developing countries: a systematic review. *World*  
565 *Health and Population*, 2014. 15(1): 07-20.
- 566 14: Misselhorn, A., et al., A systematic review of sub-national food insecurity research in South  
567 Africa: Missed opportunities for policy insights. *PLoS One*, 2017. 12(8): e0182399.
- 568 15: The Demographic and Health Surveys Program. South Africa DHS, 2016 – Final Report (English).  
569 <https://www.dhsprogram.com/publications/publication-FR337-DHS-Final-Reports.cfm> accessed  
570 25/05/2022.
- 571 16: WHO. Classification of Diabetes Mellitus 2019.  
572 <https://apps.who.int/iris/bitstream/handle/10665/325182/9789241515702-eng.pdf> accessed  
573 15/06/2023
- 574 17: Food and Agriculture Organisation of the United Nations. Food-based dietary guidelines, South  
575 Africa. Available from [https://www.fao.org/nutrition/education/food-dietary-](https://www.fao.org/nutrition/education/food-dietary-guidelines/regions/countries/south-africa/en/#:~:text=Food-based%20dietary%20guidelines%20-%20South%20Africa.%201%20Enjoy,foods%20and%20drinks%20high%20in%20sugar%20sparingly.%20)  
576 [guidelines/regions/countries/south-africa/en/#:~:text=Food-based%20dietary%20guidelines%20-](https://www.fao.org/nutrition/education/food-dietary-guidelines/regions/countries/south-africa/en/#:~:text=Food-based%20dietary%20guidelines%20-%20South%20Africa.%201%20Enjoy,foods%20and%20drinks%20high%20in%20sugar%20sparingly.%20)  
577 [%20South%20Africa.%201%20Enjoy,foods%20and%20drinks%20high%20in%20sugar%20sparingly.%](https://www.fao.org/nutrition/education/food-dietary-guidelines/regions/countries/south-africa/en/#:~:text=Food-based%20dietary%20guidelines%20-%20South%20Africa.%201%20Enjoy,foods%20and%20drinks%20high%20in%20sugar%20sparingly.%20)  
578 [20](https://www.fao.org/nutrition/education/food-dietary-guidelines/regions/countries/south-africa/en/#:~:text=Food-based%20dietary%20guidelines%20-%20South%20Africa.%201%20Enjoy,foods%20and%20drinks%20high%20in%20sugar%20sparingly.%20) accessed 21/03/2021.
- 579 18: He, F., et al., Increased consumption of fruit and vegetables is related to a reduced risk of  
580 coronary heart disease: meta-analysis of cohort studies. *Journal of Human Hypertension*, 2007. 21:  
581 717-728.



- 582 19: Azadbakht, L., et al., Effects of the Dietary Approaches to Stop Hypertension (DASH) Eating Plan  
583 on Cardiovascular Risks Among Type 2 Diabetic Patients: A randomized crossover clinical trial.  
584 *Diabetes Care*, 2011. 34(1): 55-57.
- 585 20: Pei, Q., et al., Sugar and artificially sweetened beverages and risk of obesity, type 2 diabetes  
586 mellitus, hypertension, and all-cause mortality: a dose–response meta-analysis of prospective cohort  
587 studies. *European Journal of Epidemiology*, 2020. 35: 655-671.
- 588 21: Nago, E., et al., Association of Out-of-Home Eating with Anthropometric Changes: A Systematic  
589 Review of Prospective Studies. *Critical Reviews in Food Science and Nutrition*, 2014. 54 (9): 1103-  
590 1116.
- 591 22: Levy, R., et al., Ultra-processed food consumption and type 2 diabetes incidence: A prospective  
592 cohort study. *Clinical Nutrition*, 2021. 40(5): 3606-3614.
- 593 23: Sebire, S., et al., “I’ve made this my lifestyle now”: a prospective qualitative study of motivation  
594 for lifestyle change among people with newly diagnosed type two diabetes mellitus. *BMC Public*  
595 *Health*, 2018. 18: 204.
- 596 24: Mutyambizi, C., et al., The extent and determinants of diabetes and cardiovascular disease  
597 comorbidity in South Africa – results from the South African National Health and Nutrition  
598 Examination Survey (SANHANES-1). *BMC Public Health*, 2017. 17: 745.
- 599 25: Okop, K., et al., Low intake of commonly available fruits and vegetables in socio-economically  
600 disadvantaged communities of South Africa: influence of affordability and sugary drinks intake. *BMC*  
601 *Public Health*, 2019. 19: 940.
- 602 26: Mutyambizi, C., et al., Lifestyle and socio-economic inequalities in diabetes prevalence in South  
603 Africa: A decomposition analysis. *PloS One*, 2019. 14(1): e0211208.
- 604 27: Grundlingh, N., et al., Assessment of prevalence and risk factors of diabetes and pre-diabetes  
605 in South Africa. *Journal of Health, Population and Nutrition*, 2022. 41: 7.
- 606 28: Conway, J., et al., UpSetR: an R package for the visualization of intersecting sets and their  
607 properties. *Bioinformatics*, 2017. 33 (18): 2938-2940.
- 608 29: Richard Williams, Gologit2: A Program for Generalized Logistic Regression/ Partial Proportional  
609 Odds Models for Ordinal Dependent Variables.  
610 <https://www.stata.com/meeting/4nasug/gologit2.pdf> accessed 09/12/2023.
- 611 30: Vilar-Compte, M., et al., The impact of the 2008 financial crisis on food security and food  
612 expenditures in Mexico: a disproportionate effect on the vulnerable. *Public Health Nutrition*, 2015.  
613 18 (16): 2934-2942
- 614 31: Ziraba, A., et al., Overweight and obesity in urban Africa: A problem of the rich or the poor? *BMC*  
615 *Public Health*, 2009. 9: 465.
- 616 32: Williams, R., Gologit2: A Program for Generalized Logistic Regression/ Partial Proportional Odds  
617 Models for Ordinal Dependent Variables. <https://www.stata.com/meeting/4nasug/gologit2.pdf>  
618 accessed 28/08/2023.
- 619 33: Harris, B., et al., Inequities in access to health care in South Africa. *Journal of Public Health Policy*,  
620 2011. 32 (1): S102-S123.



- 621 34: South African Non-Communicable Diseases Alliance. South Africa National NCD Strategic Plan.  
622 <https://www.sanacda.org.za/wp-content/uploads/2020/05/17-May-2020-South-Africa-NCD->  
623 STRATEGIC-PLAN\_For-Circulation.pdf accessed 19/05/2022.
- 624 35: Miller, V., et al., Fruit, vegetable, and legume intake, and cardiovascular disease and deaths in 18  
625 countries (PURE): a prospective cohort study. *Lancet*, 2017. 390: 2037-2049.
- 626 36: Ronquest-Ross, L., et al., Food consumption changes in South Africa since 1994. *South African*  
627 *Journal of Science* 2015; 111: 01-12.
- 628 37: Stats SA. Consumer Price Index April 2022.  
629 [https://www.statssa.gov.za/publications/P0141/P0141April2022\\_Tables.pdf](https://www.statssa.gov.za/publications/P0141/P0141April2022_Tables.pdf) accessed 19/05/2022.
- 630 38: Statista. Unemployment rate in South Africa from Q1 2019 to Q4 2021, by population group.  
631 [https://www.statista.com/statistics/1129481/unemployment-rate-by-population-group-in-south-](https://www.statista.com/statistics/1129481/unemployment-rate-by-population-group-in-south-africa/)  
632 africa/ accessed 19/05/2022.
- 633 39: Hunter-Adams, J., et al., Food insecurity in relation to obesity in peri-urban Cape Town, South  
634 Africa: Implications for diet-related non-communicable disease. *Appetite*, 2019. 137: 244-249.
- 635 40: Mutyambizi, C., et al., Inequalities and factors associated with adherence to diabetes self-care  
636 practices amongst patients at two public hospitals in Gauteng, South Africa. *BMC Endocrine*  
637 *Disorders*, 2020. 20: 15.
- 638 41: Jaacks, L.M., et al., The Obesity Transition: Stages of the global epidemic. *Lancet Diabetes*  
639 *Endocrinology*, 2019. 7(3): 231-240.
- 640 42: Tomaz, S., et al., Self-Reported Physical Activity in Middle-Aged and Older Adults in Rural South  
641 Africa: Levels and Correlates. *International Journal of Environmental Research and Public Health*,  
642 2020. 17(17): 6325.
- 643 43: Janssen, H., et al., Determinants of takeaway and fast-food consumption: a narrative review.  
644 *Nutrition Research Reviews*, 2018. 31: 16-34.
- 645 44: Nicol, J.U., et al., Population-level interventions targeting risk factors of diabetes and  
646 hypertension in South Africa: a document review. *BMC Public Health*, 2021. 21: 2283.
- 647 45: Hunter-Adams, J., Perceptions of weight in relation to health, hunger, and belonging among  
648 women in periurban South Africa. *Health Care for Women international*, 2019. 40(4): 347-364.
- 649 46: Booyson, B., Sclemmer, A., Reasons for diabetes patients attending Bishop Lavis Community  
650 Health Centre being non-adherent to diabetes care. *South African Family practice*, 2015. 57(3): 166-  
651 171.
- 652 47: Stacey, N., et al., Sugar-based beverage taxes and beverage prices: Evidence from South Africa's  
653 Health Promotion Levy. *Social Science and Medicine*, 2019. 238: 112465
- 654 48: World Health Organization. Diagnosis and Management of Type 2 Diabetes.  
655 file:///C:/Users/mattb/Downloads/WHO-UCN-NCD-20.1-eng%20(1).pdf accessed 20/05/2022.
- 656 49: Macaulay, S., et al., Gestational Diabetes Mellitus in Africa: A Systematic Review. *PloS One*, 2014.  
657 9(6): e97871.

Figure 1.1:

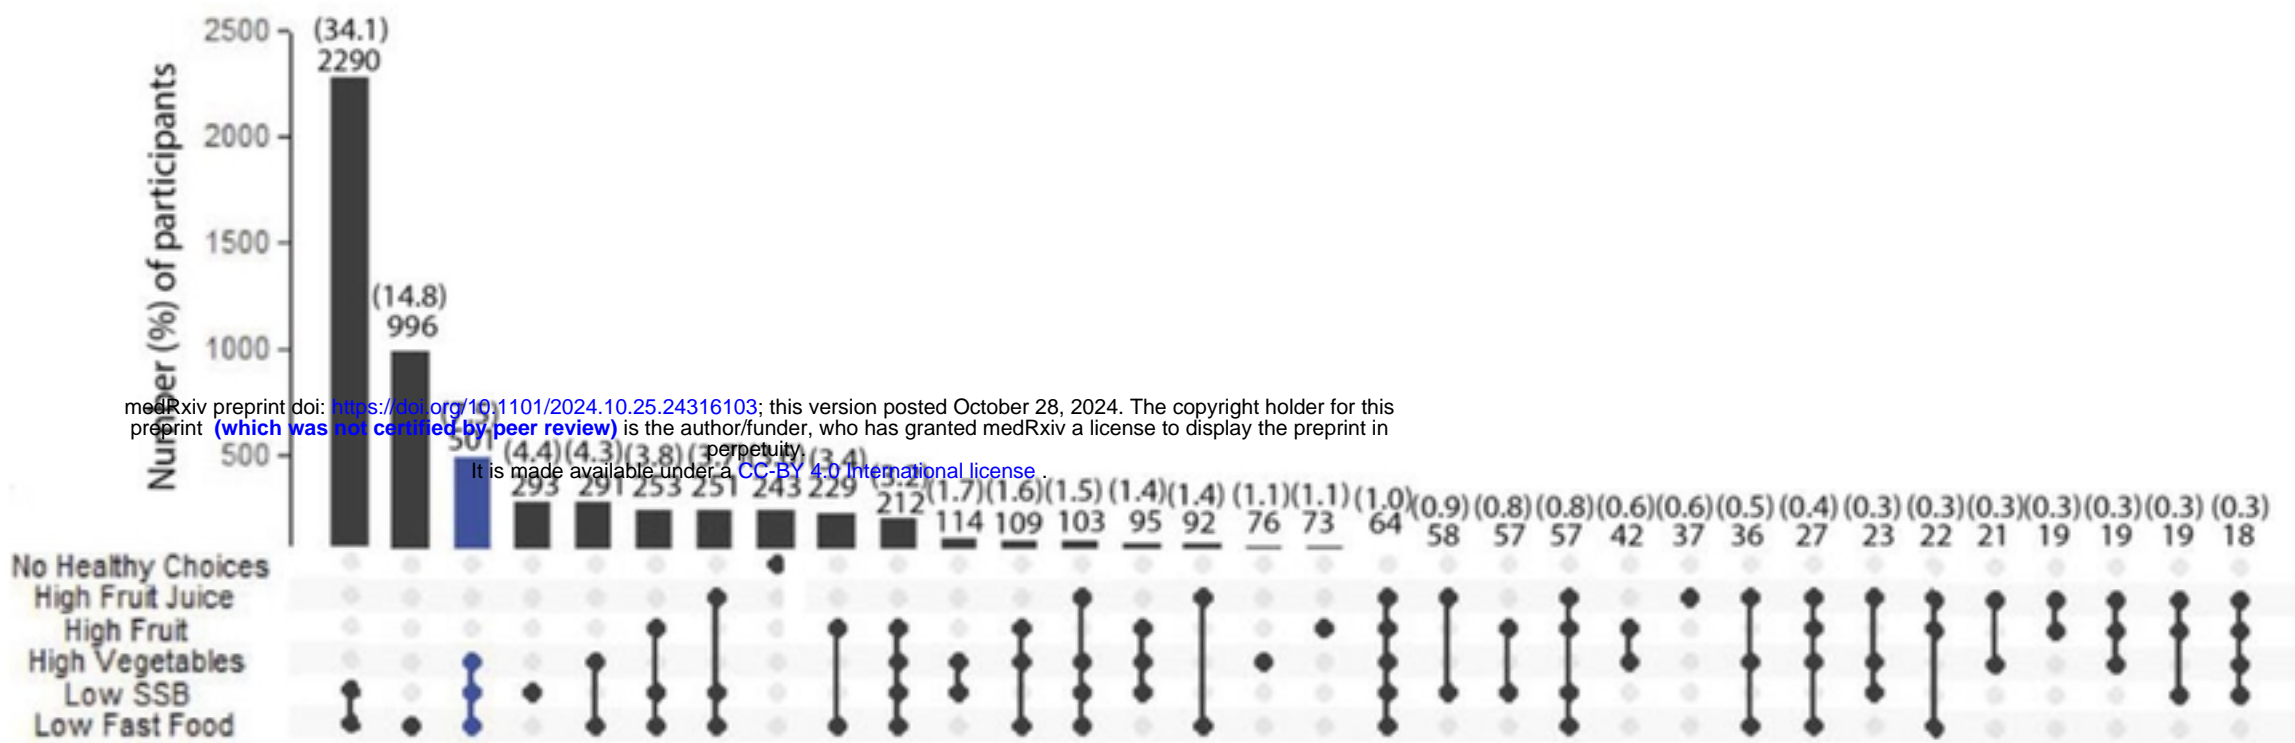

Figure 1.2

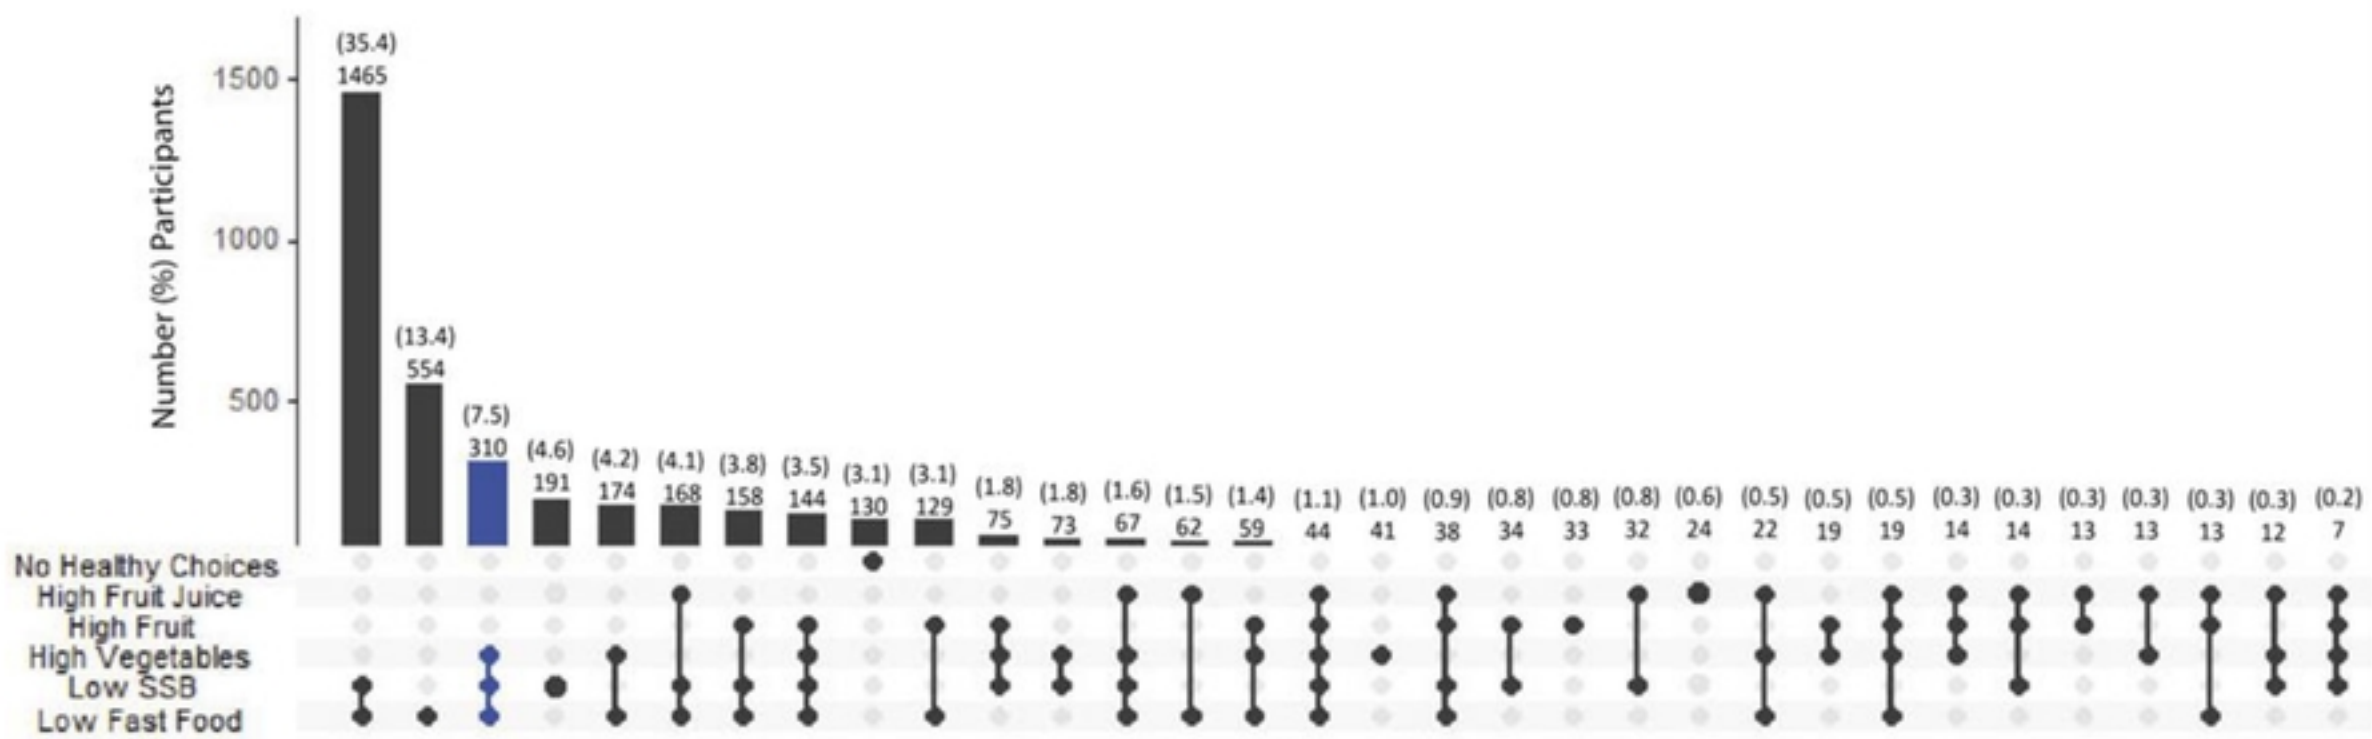

Figure 1.3

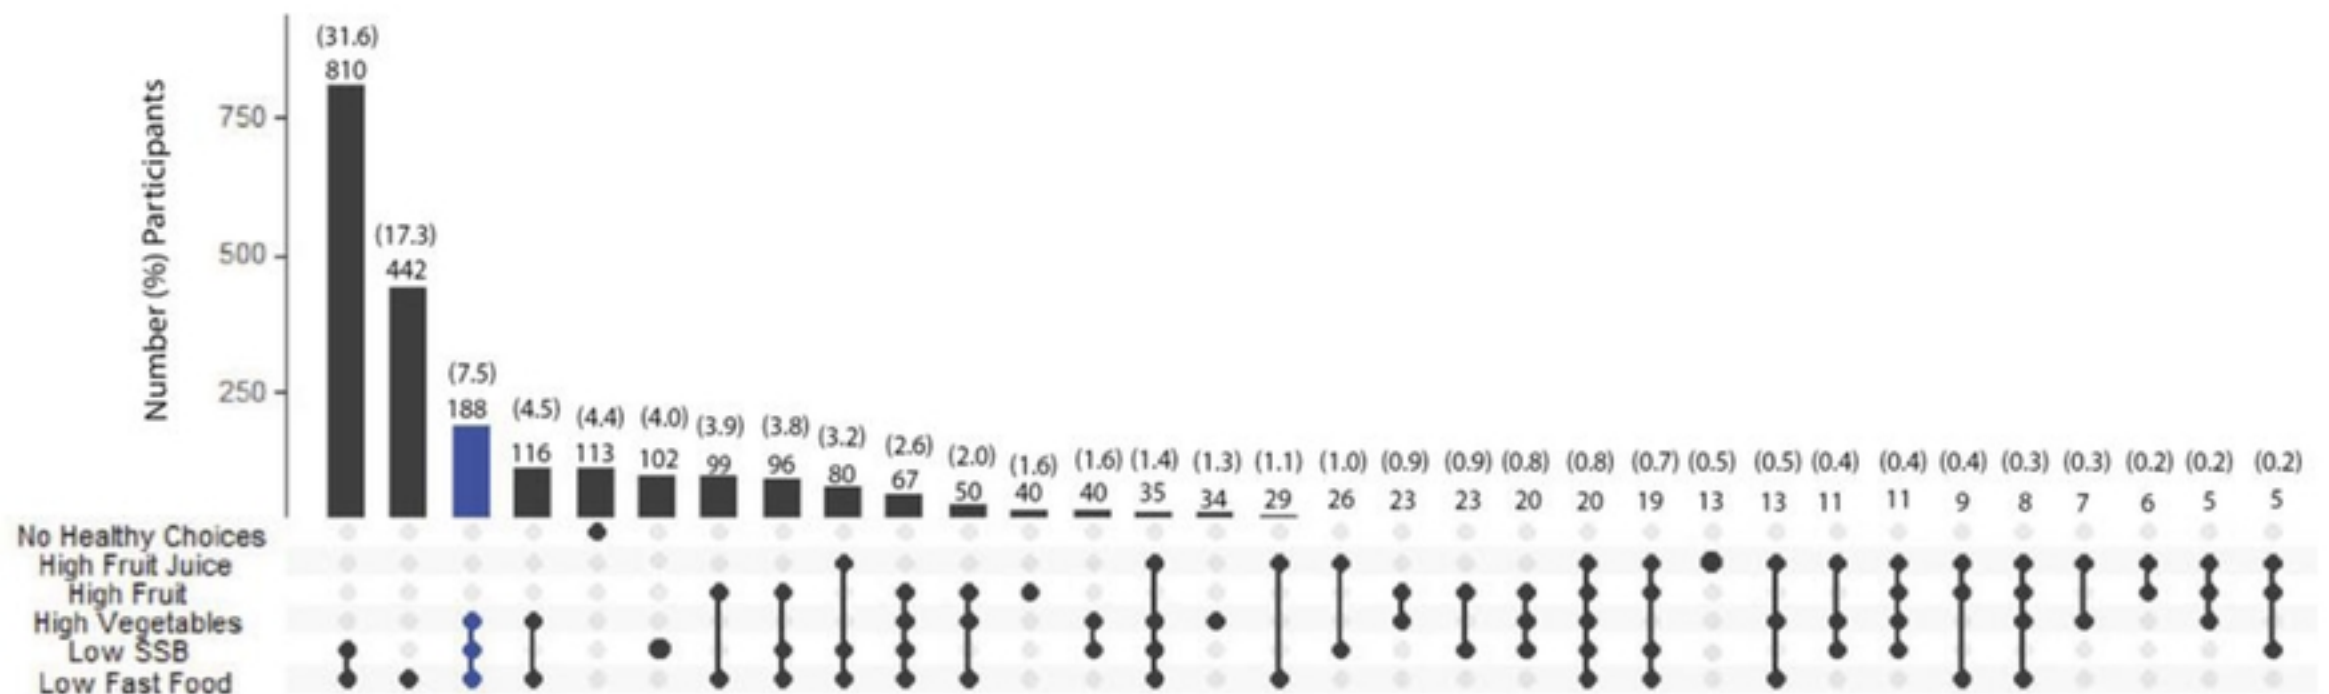

Figure
